# Supplementary material for: Metabolic Biomarkers In Midtrimester Maternal Plasma Can Accurately Predict Adverse Pregnancy Outcome in Patients with SLE
Source: PubMed Central journal article supplement (PMC6811572; doi:10.1038/s41598-019-51285-8), 2019-10-23
Supplement: 41598_2019_51285_MOESM1_ESM.pdf [file 41598_2019_51285_MOESM1_ESM.pdf]

# **Metabolic Biomarkers In Midtrimester Maternal Plasma Can Accurately Predict Adverse Pregnancy Outcome in Patients with SLE**

Seung Mi Lee, MD, PhD<sup>1</sup>, Eun Mi Lee, Ms<sup>2</sup>, Jin Kyun Park, MD, PhD<sup>3</sup>, Hae Sun Jeon, MD<sup>1</sup>, Sohee Oh, PhD<sup>4</sup>, Subeen Hong, MD<sup>1</sup>, Young Mi Jung, MD<sup>1</sup>, Byoung Jae Kim, MD<sup>1,5</sup>, Sun Min Kim, MD, PhD<sup>1,5</sup>, Errol R. Norwitz, MD, PhD<sup>6</sup>, Eun Bong Lee, MD, PhD<sup>3</sup>, Souphaphone Louangsenlath, MD<sup>7</sup>, Chan-Wook Park, MD, PhD<sup>1</sup>, Jong Kwan Jun, MD, PhD<sup>1</sup>, Joong Shin Park, MD, PhD<sup>1\*</sup>, Do Yup Lee, PhD<sup>2\*</sup>

<sup>1</sup> Department of Obstetrics and Gynecology, Seoul National University College of Medicine, Seoul, Korea

<sup>2</sup> Department of Agricultural Biotechnology, Seoul National University, Seoul, Korea

<sup>3</sup> Division of Rheumatology, Department of Internal Medicine, Seoul National University College of Medicine, Seoul, Korea

<sup>4</sup> Department of Biostatistics, Seoul Metropolitan Government Seoul National University Boramae Medical Center, Seoul, Korea

<sup>5</sup> Department of Obstetrics and Gynecology, Seoul Metropolitan Government Seoul National University Boramae Medical Center, Seoul, Korea

<sup>6</sup> Department of Obstetrics and Gynecology, Tufts University School of Medicine, Boston, MA, U.S.A

<sup>7</sup> Department of Obstetrics and Gynecology, University of health science, Lao PDR

## **Supplementary Method**

**Metabolite extraction** Analytical processes were performed in random order, including extraction, derivatization, reconstitution, and MS analysis. Metabolite was extracted by mixing 50  $\mu\text{L}$  of mid-trimester maternal serum and tertiary solvent mixture (750  $\mu\text{L}$ , methanol:isopropanol:water, 3:3:2, v/v/v) followed by 10-min sonication and centrifugation (13,200 rpm for 5 minutes at 4°C). Aliquot (750  $\mu\text{L}$ ) was transferred into a new 1.5-mL tube and concentrated to complete dryness in a speed vacuum concentrator (SCANVAC, Korea). The dried extracts were stored at -80°C until GC-TOF MS analysis.

For lipid analysis, the Folch method was applied with minor modification as follows: A 50  $\mu\text{L}$  of plasma sample was vigorously mixed with 225  $\mu\text{L}$  of MeOH for 10 s followed by the addition of chloroform (450  $\mu\text{L}$ ) and incubation for 1 hr. Water (187.5  $\mu\text{L}$ ). After phase separation, lower phase was transferred to a new vial and concentrated to complete dryness (SCANVAC, Korea). Dried extract was stored at -80°C until reconstitution for LC-Orbitrap MS analysis.

**GC-TOF analysis for primary metabolite profiling** The first derivatization process was done with 5  $\mu\text{L}$  of 40 mg/mL methoxyamine hydrochloride (Sigma-Aldrich, St. Louis, MO, USA) in pyridine (Thermo, USA) (90 min at 200 rpm at 37°C). The

mixture was derivatized with 45  $\mu$ L of N-methyl-N-trimethylsilyltrifluoroacetamide (MSTFA + 1% TMCS; Thermo, USA) for 1 h at 200 rpm at 30°C<sup>1-3</sup>. Internal retention index markers (13 fatty acid methyl esters) was added to the derivatization mixture.

Following the derivatization, 0.5  $\mu$ L of sample was injected using an Agilent 7693 ALS (Agilent Technologies, Wilmington, DE, USA). Metabolites were chromatographically separated by an Agilent 7890B gas chromatography (Agilent Technologies) with an RTX-5Sil MS column (Restek, Gellefonte, PA, USA). Mass spectrometry analysis was conducted on a Leco Pegasus HT time of flight mass spectrometer controlled by Chroma TOF software 4.50 version (LECO, St. Joseph, MI, USA). The GC oven temperatures were programmed as follows: held at 50°C for 1min, ramped to 330°C at 20°C/min, and held constant for 5 min. Acquired data were further processed based on *Binbase database*<sup>3</sup>, which generate chemical name, spectra information, retention time, unique ion, and peak height in excel format. A mixture of 33 pure standard compounds was analyzed every 10 samples for quality control purpose.

**LC-Orbitrap MS analysis** The dried extract was reconstituted with 50  $\mu$ l of acetonitrile (70%) for LC-Orbitrap MS analysis. The lipid was chromatographically separated with a 150 mm  $\times$  2.1 mm UPLC BEH 1.7- $\mu$ m C18 column (Waters Corporation, Milford, MA, USA) equipped with 5.0 mm  $\times$  2.1 mm UPLC BEH 1.7  $\mu$ m

C18 VanGuard Pre-Column (Waters Corporation, Milford, MA, USA). The liquid chromatography was conducted by Ultimate-3000 UPLC system (Thermo Fisher Scientific Inc., Waltham, MA, USA).

The lipid extract was chromatographically separated by binary solvent system consisting of solvent A (water with 10mM ammonium formate and 0.2% formic acid) and solvent B (acetonitrile with 0.2% formic acid). The gradient was as follows: equilibration in 10% solvent B for 1 min, 10–75% solvent B gradient until 7.5 min, 75–95% solvent B gradient until 7.6 min, 95% solvent B until 10.4 min, 95-10% solvent B gradient until 10.5min, and re-equilibration in 10% solvent B until 16 min.

Ten microliter of the lipid extract was used for both MS1 and MS/MS analysis. MS analysis was executed with positive and negative ionization mode using Q-Exactive Plus Orbitrap (Thermo Fisher Scientific Inc., Waltham, MA, USA). MS/MS analysis was conducted in data-dependent manner (HCD, 30 eV). Raw data (.raw format) were transformed to Analysis Base File (ABF) format by Reifycs Abf Converter (<http://www.reifycs.com/AbfConverter/index.html>). Data process (peak detection, smoothing, and deconvolution) and compound identification were done by the MS-DIAL software and Lipid Blast library (MS1 tolerance: 0.005 Da; MS2, 0.0075 Da; similarity score, 70%)<sup>4,5</sup>. A total of 222 lipids were identified and used for subsequent

statistical analysis following manual inspection on peak quality by Tracer Finder  
(Thermo Fisher Scientific Inc., Waltham, MA, USA).

## References

1. LEE DY, FIEHN O. High quality metabolomic data for *Chlamydomonas reinhardtii*. *Plant methods* 2008;4:7.
2. LEE J-E, CHO YU, KIM KH, LEE DY. Distinctive metabolomic responses of *Chlamydomonas reinhardtii* to the chemical elicitation by methyl jasmonate and salicylic acid. *Process Biochemistry* 2016;51:1147-54.
3. FIEHN O, WOHLGEMUTH G, SCHOLZ M. Setup and annotation of metabolomic experiments by integrating biological and mass spectrometric metadata. *International Workshop on Data Integration in the Life Sciences: Springer*, 2005.
4. TSUGAWA H, CAJKA T, KIND T, et al. MS-DIAL: data-independent MS/MS deconvolution for comprehensive metabolome analysis. *Nat Methods* 2015;12:523-6.
5. KIND T, LIU K-H, LEE DY, DEFELICE B, MEISSEN JK, FIEHN O. LipidBlast in silico tandem mass spectrometry database for lipid identification. *Nature Methods* 2013;10:755-58.
6. DALBY AR, KARPIEVITCH YV, NIKOLIC SB, WILSON R, SHARMAN JE, EDWARDS LM. Metabolomics Data Normalization with EigenMS. *PLoS ONE* 2014;9:e116221.
7. LI B, TANG J, YANG Q, et al. NOREVA: normalization and evaluation of MS-based metabolomics data. *Nucleic Acids Research* 2017;45:W162-W70.
8. SAEED A. TM4: a free, open-source system for microarray data management and analysis. *BioTechniques* 2003;34:374-78.
