# Supplementary material for: Metabolic Biomarkers In Midtrimester Maternal Plasma Can Accurately Predict Adverse Pregnancy Outcome in Patients with SLE
Source: PubMed Central journal article supplement (PMC6811572; doi:10.1038/s41598-019-51285-8), 2019-10-23
Supplement: 41598_2019_51285_MOESM2_ESM.pdf [file 41598_2019_51285_MOESM2_ESM.pdf]

# **Metabolic Biomarkers In Midtrimester Maternal Plasma Can Accurately Predict Adverse Pregnancy**

## **Outcome in Patients with SLE**

Seung Mi Lee, MD, PhD<sup>1</sup>, Eun Mi Lee, Ms<sup>2</sup>, Jin Kyun Park, MD, PhD<sup>3</sup>, Hae Sun Jeon, MD<sup>1</sup>, Sohee Oh, PhD<sup>4</sup>, Subeen Hong, MD<sup>1</sup>, Young Mi Jung, MD<sup>1</sup>, Byoung Jae Kim, MD<sup>1,5</sup>, Sun Min Kim, MD, PhD<sup>1,5</sup>, Errol R. Norwitz, MD, PhD<sup>6</sup>, Eun Bong Lee, MD, PhD<sup>3</sup>, Souphaphone Louangsenlath, MD<sup>7</sup>, Chan-Wook Park, MD, PhD<sup>1</sup>, Jong Kwan Jun, MD, PhD<sup>1</sup>, Joong Shin Park, MD, PhD<sup>1\*</sup>, Do Yup Lee, PhD<sup>2\*</sup>

<sup>1</sup> Department of Obstetrics and Gynecology, Seoul National University College of Medicine, Seoul, Korea

<sup>2</sup> Department of Agricultural Biotechnology, Seoul National University, Seoul, Korea

<sup>3</sup> Division of Rheumatology, Department of Internal Medicine, Seoul National University College of Medicine, Seoul, Korea

<sup>4</sup> Department of Biostatistics, Seoul Metropolitan Government Seoul National University Boramae Medical Center, Seoul, Korea

<sup>5</sup> Department of Obstetrics and Gynecology, Seoul Metropolitan Government Seoul National University Boramae Medical Center, Seoul, Korea

<sup>6</sup> Department of Obstetrics and Gynecology, Tufts University School of Medicine, Boston, MA, U.S.A

<sup>7</sup> Department of Obstetrics and Gynecology, University of health science, Lao PDR

**Supplementary table 1.** Univariate analysis of metabolomics profiles between pregnant women with SLE and normal pregnancy outcome (group 1) and pregnant women with SLE with subsequent adverse pregnancy outcome (group 2)

| Metabolites list       | Fold change | P value <sup>a</sup> | Q value <sup>b</sup> |
|------------------------|-------------|----------------------|----------------------|
| <b>Lipid molecules</b> |             |                      |                      |
| ACar C6:0              | 2.28        | 0.044                | 0.057                |
| ACar C10:2             | 1.82        | 0.033                | 0.057                |
| ACar C11:1             | 1.88        | 0.036                | 0.029                |
| ACar C14:0             | 2.13        | 0.036                | 0.037                |
| ACar C16:0             | 1.46        | 0.022                | 0.037                |
| ACar C16:4             | 1.95        | 0.014                | 0.037                |
| ACar C22:6             | 1.72        | 0.024                | 0.111                |
| FA C14:0               | 1.28        | 0.044                | 0.303                |
| FA C16:1               | 2.84        | 0.003                | 0.037                |
| FA C17:0               | 1.40        | 0.011                | 0.037                |
| FA C18:1               | 2.67        | 0.013                | 0.029                |
| FA C18:3               | 2.95        | 0.011                | 0.037                |
| FA C20:4               | 2.42        | 0.033                | 0.037                |
| FA C22:5               | 6.52        | 0.001                | 0.029                |
| FA C22:6               | 3.63        | 0.001                | 0.037                |
| FA C24:0               | 1.31        | 0.036                | 0.057                |
| LysoPC C14:0           | 0.18        | 0.009                | 0.437                |

|                     |      |       |       |
|---------------------|------|-------|-------|
| LysoPC C15:0        | 0.38 | 0.033 | 0.402 |
| LysoPC C16:1        | 0.30 | 0.009 | 0.437 |
| LysoPC C16:2        | 0.61 | 0.010 | 0.474 |
| LysoPC C18:2        | 0.59 | 0.030 | 0.241 |
| LysoPC C18:3        | 0.33 | 0.008 | 0.241 |
| LysoPC C20:4        | 1.26 | 0.036 | 0.081 |
| LysoPC C20:5        | 1.25 | 0.040 | 0.303 |
| LysoPC C22:5        | 1.60 | 0.013 | 0.037 |
| LysoPC C22:6        | 1.53 | 0.001 | 0.037 |
| LysoPE C18:0        | 1.30 | 0.048 | 0.057 |
| LysoPE C18:2        | 0.57 | 0.030 | 0.241 |
| LysoPE C22:5        | 2.23 | 0.044 | 0.111 |
| LysoPE C22:6        | 1.52 | 0.044 | 0.081 |
| OxFA C18:0+1O(1Cyc) | 2.16 | 0.027 | 0.057 |
| OxFA C20:4+1O(1Cyc) | 1.79 | 0.005 | 0.333 |
| OxPC C34:3+1O       | 2.57 | 0.013 | 0.333 |
| OxPC C36:4+1O(1Cyc) | 1.54 | 0.014 | 0.242 |
| OxPC C40:5+1O(1Cyc) | 0.45 | 0.007 | 0.241 |
| PC C24:6            | 2.35 | 0.016 | 0.057 |
| PC C34:3            | 0.55 | 0.033 | 0.276 |
| PC C35:5            | 0.47 | 0.002 | 0.276 |
| PC C36:6            | 0.61 | 0.005 | 0.241 |
| PC C38:5            | 0.56 | 0.024 | 0.241 |

|                          |      |       |       |
|--------------------------|------|-------|-------|
| PE C22:1                 | 0.96 | 0.013 | N/A   |
| PE C24:0                 | 0.99 | 0.022 | N/A   |
| PE C36:4                 | 0.53 | 0.014 | 0.241 |
| PE C38:5                 | 0.56 | 0.030 | 0.241 |
| PtdIns C34:1             | 0.64 | 0.044 | 0.402 |
| SM C30:2                 | 0.58 | 0.048 | 0.410 |
| <hr/>                    |      |       |       |
| Primary metabolites      |      |       |       |
| <hr/>                    |      |       |       |
| 2-deoxytetronic acid     | 1.75 | 0.011 | 0.037 |
| Glyceric acid            | 0.73 | 0.036 | 0.276 |
| Glycerol-alpha-phosphate | 1.69 | 0.024 | 0.037 |
| Lysine                   | 0.70 | 0.003 | 0.241 |
| Malic acid               | 1.38 | 0.013 | 0.029 |
| Methionine               | 0.72 | 0.027 | 0.402 |
| Proline                  | 0.60 | 0.022 | 0.241 |
| Tryptophan               | 0.65 | 0.001 | 0.000 |
| Tyrosine                 | 0.79 | 0.022 | 0.241 |

ACar, acylcarnitine; FA, free fatty acid; LysoPC, lysophosphatidylcholine; LysoPE, lysophosphatidylethanolamine; OxFA, oxidized fatty acid; OxPC, oxidized phosphatidylcholine; PC, phosphatidylcholine; PE, phosphatidylethanolamine; PtdIns, phosphatidylinositol; SM, sphingomyelin.

<sup>a</sup> P value is computed based on Mann-Whitney U test.

<sup>b</sup> Q value is calculated based on false discovery rate estimation.
